# Supplementary material for: Exploring the Effects of Rearing Densities on Epigenetic Modifications in the Zebrafish Gonads
Source: Preprints.org preprint supplement (doi:10.20944/preprints202309.1870.v1), 2023-09-27
Supplement: Supplementary file 1 [file supplementary]

## Sheet: Table S1
Table S1. Number of families used and the sex ratio obtained for the experiment
Density level period (dpf)	#Family	Males	Females	Percent males	Total number fish
Control	1	14.7179	26.2821	35.8974	369 (223 control 7–18 dpf) (196 control 18–45 dpf)
	2	25	20	55.5556
	3	9	7	56.25
	4	31	22	58.4906
	5	11	7	61.1111
	6	32	18	64
	7	47	17	73.4375
	8	74	8	90.2439
7–18	6	83	17	83	221
	7	50	19	72.4638
	8	43	9	82.6923
18–45	1	12	20	37.5	413
	2	118	38	75.641
	3	10	3	76.9231
	4	74	34	68.5185
	5	38	21	64.4068
	6	37	8	82.2222
				Total	1003

## Sheet: Table S2
Table S2. Primer sequences, the coordinate location in the Danio rerio genome (GRCz11) and the number of CpG sites of three immune related genes used for DNA methylation analysis. Abbreviation: TSS: transcription start site
Gene name	Gene symbol	Reference sequence	Chromosome	Strand	Forward primer (5' to 3')	Reverse primer (5' to 3')	Start coordinate amplicon	End coordinate amplicon	Amplicon size bp and relative position from TSS	Total number of CpG	Number of CpG before TSS	Temperature annealing (°C)	Reference
anti-Müllerian hormone	amh	NM_001007779	22	−	TTTTATTTTATTAAAATTTAAGGTATGTGA	AACACTCCTCCCAAAATATAAAAAC	20736331	20736847	517 (-217, +300)	18	8	51	10.1111/1755-0998.13725
double-sex and mab-3 related transcription factor 1	dmrt1	NM_205628	5	+	AATATTTTTTATTGTGGTGTTTGTT	CAAAATAACCTCTCATAACCTTATC	44344542	44345024	483 (-249, +234)	24	10	53	10.1111/1755-0998.13725
cytochrome P450, family 19, subfamily A, polypeptide 1a	cyp19a1a	NM_131154	18	−	TATTTTTTGTTTGTTTGTAGGTTTGAT	CAACAATATTATAACTATAACTCCACAC	39655109	39655578	470 (-326, +144)	15	9	53	10.1111/1755-0998.13725
hydroxysteroid (11-β) dehydrogenase 2	hsd11β2	NM_212720	7	−	GTAAAGTTTTGGTTATTGGGTTTTG	CAACCATACCACCACTAAAAACATA	34854510	34854994	485 (-362, +123)	9	5	59	10.1111/1755-0998.13725
hydroxysteroid (17-β) dehydrogenase 1	hsd17β1	NM_205584	3	−	ATTGTGATTAAAAATTTATAAGATGTATGA	CAATAATCATACATTAAACACAAAATAATA	17897321	17897746	426 (-394, +30)	6	6	53	10.1111/1755-0998.13725
cytochrome P450, family 11, subfamily C, polypeptide 1	cyp11c1	NM_001080204	16	−	TTTTTTTTGATTTGTGTTTTTTTATAGTAA	AACTCCTCCATATATTTATACATAC	54645580	54645995	416 (-201, +215)	19	2	57	10.1111/1755-0998.13725
DNA (cytosine-5)-methyltransferase 1	dnmt1	NM_131189	3	−	AAATTTATGGGTAAATATGTATTTTTGAG	AAATCTTAATAAACATTTCAAATTC	54352441	54352912	472 (-456, +16)	26	26	50	10.1111/1755-0998.13725

## Sheet: Table S3
Table S3. Primer sequences used for quantitative (qPCR) gene expression
Gene	Gene name	Gene symbol	Reference sequence	Forward (5' to 3')	Reverse (5' to 3')	Reference
Target	anti-Müllerian hormone	amh	NM_001007779	ACAACCCGAAGGTCAACCCGC	GTGGCATGTTGGTCAGTTGGCTG	10.1016/j.stemcr.2014.10.011
	cytochrome P450, family 11, subfamily C, polypeptide 1	cyp11c1	NM_001080204	CCTCGGGCCCATATACAGAGA	CGTCCCGTTCTTGAGGAAGA	10.1016/j.stemcr.2014.10.011
	cytochrome P450, family 19, subfamily A, polypeptide 1a	cyp19a1a	NM_131154	GATATTTGCTCAGAGCCATGGA	GCTCTGGCCAGCTAAAACACT	10.1016/j.stemcr.2014.10.011
	doublesex and mab-3 related transcription factor 1	dmrt1	NM_205628	TGCCCAGGTGGCGTTACGG	CGGGTGATGGCGGTCCTGAG	10.1016/j.stemcr.2014.10.011
	hydroxysteroid (11-β) dehydrogenase 2	hsd11b2	NM_212720	GGGGGTCAAAGTTTCCACTA	TGGAAGAGCTCCTTGGTCTC	10.1371/journal.pone.0054851
Reference gene	eukaryotic translation elongation factor 1 α 1 like 1	eef1a1l1	NM_131263	GGAGGCTGCCAACTTCAACGC	GGCGATGTGAGCAGTGTGGC	10.1111/j.1745-7270.2007.00283.x
	ribosomal protein L13a	rpl13a	NM_212784	TCTGGAGGACTGTAAGAGGTATGC	AGACGCACAATCTTGAGAGCAG	10.1111/j.1745-7270.2007.00283.x

## Sheet: Table S4
Table S4. Fish biometry for each density treatment sampled at 90 days post fertilitzation (dpf)
#Family	Periode exposure (dpf)	Density level (fish/L)	Sex	Body weight (BW, g)	Standard length (SL, cm)
1	Control	9	F	0.445	2.7
1	Control	9	F	0.98	3.1
1	Control	9	F	0.64	3.2
1	Control	9	F	0.36	2.6
1	Control	9	F	0.39	2.8
1	Control	9	F	0.45	2.8
1	Control	9	F	0.46	2.7
1	Control	9	F	0.255	2.4
1	Control	9	F	0.47	2.9
1	Control	9	F	0.535	3
1	Control	9	F	0.54	3.1
1	Control	9	F	0.37	2.6
1	Control	9	F	0.33	2.7
1	Control	9	F	0.405	2.7
1	Control	9	F	0.45	2.7
1	Control	9	F	0.43	3
1	Control	9	F	0.56	3
1	Control	9	F	0.42	3.5
1	Control	9	F	0.53	2.8
1	Control	9	F	0.565	2.9
1	Control	9	F	0.35	2.4
1	Control	9	F	0.415	2.7
1	Control	9	F	0.43	3
1	Control	9	F	0.4	2.9
1	Control	9	F	0.31	2.5
1	Control	9	F	0.44	2.8
1	Control	9	M	0.13	2
1	Control	9	M	0.345	2.9
1	Control	9	M	0.295	2.7
1	Control	9	M	0.39	2.7
1	Control	9	M	0.4	2.8
1	Control	9	M	0.33	2.8
1	Control	9	M	0.325	2.6
1	Control	9	M	0.415	2.7
1	Control	9	M	0.465	2.8
1	Control	9	M	0.315	2.6
1	Control	9	M	0.47	2.8
1	Control	9	M	0.625	3
1	Control	9	M	0.35	2.6
1	Control	9	M	0.395	2.4
1	Control	9	M	0.43	2.7
1	18–45	66	F	0.705	3.1
1	18–45	66	F	0.415	2.7
1	18–45	66	F	0.79	3.2
1	18–45	66	F	0.82	3.4
1	18–45	66	F	0.625	3
1	18–45	66	F	0.515	3
1	18–45	66	F	0.525	2.8
1	18–45	66	F	0.565	2.7
1	18–45	66	F	0.44	2.5
1	18–45	66	F	0.39	2.5
1	18–45	66	F	0.415	2.6
1	18–45	66	F	0.54	3
1	18–45	66	F	0.61	3
1	18–45	66	F	0.525	2.9
1	18–45	66	F	0.45	3
1	18–45	66	F	0.34	2.6
1	18–45	66	F	0.495	2.6
1	18–45	66	F	0.525	3
1	18–45	66	F	0.535	2.6
1	18–45	66	F	0.42	2.8
1	18–45	66	M	0.57	3.1
1	18–45	66	M	0.35	2.4
1	18–45	66	M	0.315	1.8
1	18–45	66	M	0.22	1.9
1	18–45	66	M	0.56	3.4
1	18–45	66	M	0.55	2.5
1	18–45	66	M	0.37	2.5
1	18–45	66	M	0.435	2.9
1	18–45	66	M	0.2	1.9
1	18–45	66	M	0.335	2.6
1	18–45	66	M	0.39	2.6
1	18–45	66	M	0.355	2.4
2	Control	9	F	0.31	2.6
2	Control	9	F	0.42	2.5
2	Control	9	F	0.31	2.4
2	Control	9	F	0.46	2.6
2	Control	9	F	0.33	2.5
2	Control	9	F	0.36	2.5
2	Control	9	F	0.27	2.3
2	Control	9	F	0.35	2.5
2	Control	9	F	0.2	2.2
2	Control	9	F	0.43	2.6
2	Control	9	F	0.46	2.7
2	Control	9	F	0.2	2.3
2	Control	9	F	0.53	2.9
2	Control	9	F	0.5	2.9
2	Control	9	F	0.41	2.7
2	Control	9	F	0.37	2.7
2	Control	9	F	0.31	2.6
2	Control	9	F	0.47	2.8
2	Control	9	F	0.37	2.7
2	Control	9	F	0.47	2.9
2	Control	9	M	0.32	2.5
2	Control	9	M	0.34	2.6
2	Control	9	M	0.18	2.3
2	Control	9	M	0.25	2.4
2	Control	9	M	0.22	2.4
2	Control	9	M	0.32	2.7
2	Control	9	M	0.19	2.3
2	Control	9	M	0.32	2.4
2	Control	9	M	0.32	2.6
2	Control	9	M	0.28	2.5
2	Control	9	M	0.1	1.8
2	Control	9	M	0.21	2.3
2	Control	9	M	0.32	2.5
2	Control	9	M	0.21	2.2
2	Control	9	M	0.23	2.4
2	Control	9	M	0.36	2.7
2	Control	9	M	0.28	2.5
2	Control	9	M	0.4	2.8
2	Control	9	M	0.37	2.8
2	Control	9	M	0.28	2.5
2	Control	9	M	0.28	2.5
2	Control	9	M	0.13	1.9
2	Control	9	M	0.1	1.9
2	Control	9	M	0.31	2.5
2	Control	9	M	0.27	2.7
2	18–45	66	F	0.32	2.3
2	18–45	66	F	0.24	2.4
2	18–45	66	F	0.19	2.3
2	18–45	66	F	0.33	2.6
2	18–45	66	F	0.16	2.2
2	18–45	66	F	0.31	2.6
2	18–45	66	F	0.28	2.4
2	18–45	66	F	0.26	2.3
2	18–45	66	F	0.22	2.4
2	18–45	66	F	0.25	2.4
2	18–45	66	F	0.29	2.5
2	18–45	66	F	0.27	2.4
2	18–45	66	F	0.15	2
2	18–45	66	F	0.32	2.5
2	18–45	66	F	0.25	2.4
2	18–45	66	F	0.22	2.4
2	18–45	66	F	0.31	2.4
2	18–45	66	F	0.29	2.5
2	18–45	66	F	0.27	2.3
2	18–45	66	F	0.17	2.2
2	18–45	66	F	0.12	1.6
2	18–45	66	F	0.22	2.3
2	18–45	66	F	0.31	2.6
2	18–45	66	F	0.32	2.5
2	18–45	66	F	0.23	2.3
2	18–45	66	F	0.19	2.3
2	18–45	66	F	0.24	2.4
2	18–45	66	F	0.25	2.4
2	18–45	66	F	0.34	2.7
2	18–45	66	F	0.25	2.4
2	18–45	66	F	0.27	2.5
2	18–45	66	F	0.27	2.8
2	18–45	66	F	0.26	2.4
2	18–45	66	F	0.35	2.6
2	18–45	66	F	0.28	2.5
2	18–45	66	F	0.22	2.3
2	18–45	66	F	0.24	2.4
2	18–45	66	F	0.25	2.39
2	18–45	66	M	0.16	2
2	18–45	66	M	0.31	2.6
2	18–45	66	M	0.27	2.5
2	18–45	66	M	0.1	1.7
2	18–45	66	M	0.27	2.4
2	18–45	66	M	0.29	2.5
2	18–45	66	M	0.31	2.5
2	18–45	66	M	0.21	2.3
2	18–45	66	M	0.15	2.1
2	18–45	66	M	0.27	2.4
2	18–45	66	M	0.19	2.3
2	18–45	66	M	0.25	2.4
2	18–45	66	M	0.3	2.6
2	18–45	66	M	0.24	2.4
2	18–45	66	M	0.08	1.6
2	18–45	66	M	0.24	2.4
2	18–45	66	M	0.16	2.1
2	18–45	66	M	0.14	1.9
2	18–45	66	M	0.16	2
2	18–45	66	M	0.17	2.2
2	18–45	66	M	0.15	2
2	18–45	66	M	0.22	2.2
2	18–45	66	M	0.14	2
2	18–45	66	M	0.15	1.9
2	18–45	66	M	0.14	1.9
2	18–45	66	M	0.17	2
2	18–45	66	M	0.15	2.1
2	18–45	66	M	0.13	1.9
2	18–45	66	M	0.11	1.8
2	18–45	66	M	0.09	1.7
2	18–45	66	M	0.07	1.5
2	18–45	66	M	0.19	1.9
2	18–45	66	M	0.18	2.1
2	18–45	66	M	0.15	1.9
2	18–45	66	M	0.15	1.9
2	18–45	66	M	0.09	1.7
2	18–45	66	M	0.22	2.4
2	18–45	66	M	0.24	2.3
2	18–45	66	M	0.13	1.9
2	18–45	66	M	0.08	1.7
2	18–45	66	M	0.28	2.5
2	18–45	66	M	0.16	2
2	18–45	66	M	0.18	2.1
2	18–45	66	M	0.08	1.7
2	18–45	66	M	0.1	1.7
2	18–45	66	M	0.29	2.6
2	18–45	66	M	0.11	1.8
2	18–45	66	M	0.09	1.7
2	18–45	66	M	0.16	2.2
2	18–45	66	M	0.26	2.6
2	18–45	66	M	0.1	1.9
2	18–45	66	M	0.08	1.7
2	18–45	66	M	0.16	2.1
2	18–45	66	M	0.17	2.1
2	18–45	66	M	0.18	2.1
2	18–45	66	M	0.19	2.2
2	18–45	66	M	0.13	1.7
2	18–45	66	M	0.15	2
2	18–45	66	M	0.07	1.6
2	18–45	66	M	0.09	1.7
2	18–45	66	M	0.1	1.7
2	18–45	66	M	0.06	1.4
2	18–45	66	M	0.26	2.5
2	18–45	66	M	0.24	2.4
2	18–45	66	M	0.29	2.5
2	18–45	66	M	0.28	2.6
2	18–45	66	M	0.29	2.5
2	18–45	66	M	0.19	2.3
2	18–45	66	M	0.14	2.2
2	18–45	66	M	0.19	2.3
2	18–45	66	M	0.23	2.5
2	18–45	66	M	0.27	2.5
2	18–45	66	M	0.23	2.5
2	18–45	66	M	0.24	2.5
2	18–45	66	M	0.2	2.5
2	18–45	66	M	0.09	1.8
2	18–45	66	M	0.12	2
2	18–45	66	M	0.14	2.1
2	18–45	66	M	0.12	1.8
2	18–45	66	M	0.29	2.6
2	18–45	66	M	0.24	2.5
2	18–45	66	M	0.21	2.3
2	18–45	66	M	0.16	2.1
2	18–45	66	M	0.19	2.3
2	18–45	66	M	0.23	2.5
2	18–45	66	M	0.22	2.5
2	18–45	66	M	0.13	2.1
2	18–45	66	M	0.24	2.5
2	18–45	66	M	0.27	2.6
2	18–45	66	M	0.19	2.3
2	18–45	66	M	0.07	1.8
2	18–45	66	M	0.22	2.4
2	18–45	66	M	0.25	2.5
2	18–45	66	M	0.2	2.2
2	18–45	66	M	0.17	2.1
2	18–45	66	M	0.22	2.3
2	18–45	66	M	0.25	2.5
2	18–45	66	M	0.27	2.6
2	18–45	66	M	0.27	2.5
2	18–45	66	M	0.16	2.3
2	18–45	66	M	0.22	2.3
2	18–45	66	M	0.17	2.2
2	18–45	66	M	0.09	1.8
2	18–45	66	M	0.16	2.2
2	18–45	66	M	0.17	2.3
2	18–45	66	M	0.18	2.3
2	18–45	66	M	0.13	2.1
2	18–45	66	M	0.22	2.4
2	18–45	66	M	0.2	2.4
2	18–45	66	M	0.19	2.4
2	18–45	66	M	0.21	2.4
2	18–45	66	M	0.1	2
2	18–45	66	M	0.12	2
2	18–45	66	M	0.2	2.2
2	18–45	66	M	0.14	2.1
2	18–45	66	M	0.06	1.7
2	18–45	66	M	0.09	1.9
2	18–45	66	M	0.07	1.5
3	Control	9	F	0.435	3.1
3	Control	9	F	0.61	3.3
3	Control	9	F	0.79	3.5
3	Control	9	F	0.59	2.9
3	Control	9	F	0.355	2.7
3	Control	9	F	0.595	3.2
3	Control	9	F	0.42	3.1
3	Control	9	M	0.4	2.9
3	Control	9	M	0.36	2.5
3	Control	9	M	0.575	2.9
3	Control	9	M	0.545	3.3
3	Control	9	M	0.535	3.3
3	Control	9	M	0.46	3.1
3	Control	9	M	0.4	3
3	Control	9	M	0.415	3.2
3	Control	9	M	0.505	3.2
3	18–45	66	F	0.5	3.1
3	18–45	66	F	0.46	2.6
3	18–45	66	F	0.44	2.8
3	18–45	66	M	0.53	3.1
3	18–45	66	M	0.445	2.7
3	18–45	66	M	0.4	2.9
3	18–45	66	M	0.4	3
3	18–45	66	M	0.66	3.3
3	18–45	66	M	0.53	3.2
3	18–45	66	M	0.47	2.9
3	18–45	66	M	0.48	3.2
3	18–45	66	M	0.305	2.8
3	18–45	66	M	0.42	3.2
4	Control	9	F	0.215	2.1
4	Control	9	F	0.265	2.5
4	Control	9	F	0.19	2.2
4	Control	9	F	0.16	2.2
4	Control	9	F	0.245	2.4
4	Control	9	F	0.355	2.7
4	Control	9	F	0.19	2.2
4	Control	9	F	0.2	2
4	Control	9	F	0.23	2.4
4	Control	9	F	0.17	2.2
4	Control	9	F	0.21	2.4
4	Control	9	F	0.19	2.3
4	Control	9	F	0.195	2.2
4	Control	9	F	0.24	2.4
4	Control	9	F	0.225	2.3
4	Control	9	F	0.2	2.3
4	Control	9	F	0.24	2.5
4	Control	9	F	0.245	2.2
4	Control	9	F	0.205	2.3
4	Control	9	F	0.14	2
4	Control	9	F	0.145	2
4	Control	9	F	0.135	2
4	Control	9	M	0.205	2.3
4	Control	9	M	0.275	2.5
4	Control	9	M	0.145	2.1
4	Control	9	M	0.215	2.3
4	Control	9	M	0.235	2.5
4	Control	9	M	0.295	2.1
4	Control	9	M	0.255	2.5
4	Control	9	M	0.235	2.3
4	Control	9	M	0.14	2.2
4	Control	9	M	0.14	2
4	Control	9	M	0.195	2.2
4	Control	9	M	0.23	2.4
4	Control	9	M	0.18	2.2
4	Control	9	M	0.18	2.2
4	Control	9	M	0.31	2.6
4	Control	9	M	0.145	2.2
4	Control	9	M	0.175	2.3
4	Control	9	M	0.23	2.5
4	Control	9	M	0.155	2
4	Control	9	M	0.23	2.5
4	Control	9	M	0.265	2.5
4	Control	9	M	0.25	2.3
4	Control	9	M	0.19	2.2
4	Control	9	M	0.165	2.1
4	Control	9	M	0.18	2.3
4	Control	9	M	0.265	2.5
4	Control	9	M	0.17	2.2
4	Control	9	M	0.23	2.5
4	Control	9	M	0.22	2.2
4	Control	9	M	0.145	2.1
4	Control	9	M	0.125	2
4	18–45	66	F	0.265	2.3
4	18–45	66	F	0.17	2.1
4	18–45	66	F	0.295	2.4
4	18–45	66	F	0.23	2.4
4	18–45	66	F	0.245	2.3
4	18–45	66	F	0.245	2.3
4	18–45	66	F	0.245	2.4
4	18–45	66	F	0.255	2.2
4	18–45	66	F	0.21	2.3
4	18–45	66	F	0.22	2.4
4	18–45	66	F	1.7	2
4	18–45	66	F	0.305	2.5
4	18–45	66	F	0.235	2.2
4	18–45	66	F	0.265	2.6
4	18–45	66	F	0.375	2.7
4	18–45	66	F	0.2	2.2
4	18–45	66	F	0.225	2.4
4	18–45	66	F	0.16	2
4	18–45	66	F	0.215	2.1
4	18–45	66	F	0.145	2.1
4	18–45	66	F	0.175	2.2
4	18–45	66	F	0.195	2.1
4	18–45	66	F	0.13	1.9
4	18–45	66	F	0.13	1.9
4	18–45	66	F	0.15	2
4	18–45	66	F	0.22	2.3
4	18–45	66	F	0.205	2.2
4	18–45	66	F	0.145	2.2
4	18–45	66	F	0.23	2.3
4	18–45	66	F	0.275	2.5
4	18–45	66	F	0.25	2.3
4	18–45	66	F	0.15	2.1
4	18–45	66	F	0.23	2.4
4	18–45	66	F	0.215	2.2
4	18–45	66	M	0.24	2.5
4	18–45	66	M	0.255	2.4
4	18–45	66	M	0.195	2.4
4	18–45	66	M	0.31	2.7
4	18–45	66	M	0.115	1.9
4	18–45	66	M	0.155	2.1
4	18–45	66	M	0.19	2.2
4	18–45	66	M	0.245	2.5
4	18–45	66	M	0.26	2.1
4	18–45	66	M	0.13	1.9
4	18–45	66	M	0.21	2.3
4	18–45	66	M	0.095	1.7
4	18–45	66	M	0.18	2.3
4	18–45	66	M	0.29	2.5
4	18–45	66	M	0.22	2.1
4	18–45	66	M	0.245	2.5
4	18–45	66	M	0.23	2.4
4	18–45	66	M	0.335	2.6
4	18–45	66	M	0.28	2.6
4	18–45	66	M	0.13	2
4	18–45	66	M	0.19	2.3
4	18–45	66	M	0.145	2
4	18–45	66	M	0.19	2.3
4	18–45	66	M	0.18	2.1
4	18–45	66	M	0.235	2.5
4	18–45	66	M	0.095	1.9
4	18–45	66	M	0.115	2
4	18–45	66	M	0.135	2
4	18–45	66	M	0.05	1.4
4	18–45	66	M	0.105	1.9
4	18–45	66	M	0.125	2.1
4	18–45	66	M	0.145	2
4	18–45	66	M	0.15	2.1
4	18–45	66	M	0.085	2.9
4	18–45	66	M	0.075	1.7
4	18–45	66	M	0.145	2.2
4	18–45	66	M	0.115	1.1
4	18–45	66	M	0.155	2.1
4	18–45	66	M	0.21	2.4
4	18–45	66	M	0.15	2.1
4	18–45	66	M	0.1	1.9
4	18–45	66	M	0.085	1.8
4	18–45	66	M	0.075	1.8
4	18–45	66	M	0.18	2.2
4	18–45	66	M	0.22	2.3
4	18–45	66	M	0.155	2.2
4	18–45	66	M	0.155	2.1
4	18–45	66	M	0.125	2.1
4	18–45	66	M	0.055	1.5
4	18–45	66	M	0.06	1.5
4	18–45	66	M	0.15	2.1
4	18–45	66	M	0.1	1.9
4	18–45	66	M	0.115	1.9
4	18–45	66	M	0.29	2.5
4	18–45	66	M	0.25	2.4
4	18–45	66	M	0.21	2.3
4	18–45	66	M	0.08	1.7
4	18–45	66	M	0.135	1.9
4	18–45	66	M	0.24	2.3
4	18–45	66	M	0.125	2.1
4	18–45	66	M	0.21	2.3
4	18–45	66	M	0.12	1.9
4	18–45	66	M	0.075	1.7
4	18–45	66	M	0.07	1.7
4	18–45	66	M	0.25	2.4
4	18–45	66	M	0.09	1.8
4	18–45	66	M	0.135	2.1
4	18–45	66	M	0.105	1.9
4	18–45	66	M	0.075	1.6
4	18–45	66	M	0.09	1.8
4	18–45	66	M	0.08	1.7
4	18–45	66	M	0.28	2.5
4	18–45	66	M	0.125	2
4	18–45	66	M	0.135	2
5	Control	9	F	0.65	2.6
5	Control	9	F	0.77	3
5	Control	9	F	0.44	2.4
5	Control	9	F	0.605	3.1
5	Control	9	F	0.485	2.8
5	Control	9	F	0.445	2.8
5	Control	9	F	0.495	3.1
5	Control	9	M	0.52	3.1
5	Control	9	M	0.46	2.9
5	Control	9	M	0.495	2.4
5	Control	9	M	0.38	2.6
5	Control	9	M	0.46	2.8
5	Control	9	M	0.595	3
5	Control	9	M	0.48	2.7
5	Control	9	M	0.42	2.7
5	Control	9	M	0.29	2.2
5	Control	9	M	0.36	2.4
5	Control	9	M	0.32	2.2
5	18–45	66	F	1.06	3.7
5	18–45	66	F	0.815	3.6
5	18–45	66	F	0.48	2.7
5	18–45	66	F	1.05	3.6
5	18–45	66	F	0.655	3
5	18–45	66	F	0.75	3.4
5	18–45	66	F	0.735	3.5
5	18–45	66	F	0.665	3.5
5	18–45	66	F	0.345	2.1
5	18–45	66	F	1	3.6
5	18–45	66	F	0.785	3.1
5	18–45	66	F	0.31	2.2
5	18–45	66	F	0.525	3
5	18–45	66	F	0.555	3.9
5	18–45	66	F	0.62	3.3
5	18–45	66	F	0.5	3.2
5	18–45	66	F	0.59	3
5	18–45	66	F	0.71	3.6
5	18–45	66	F	0.79	3.8
5	18–45	66	F	0.46	3.1
5	18–45	66	F	0.49875	2.9
5	18–45	66	M	0.495	3.1
5	18–45	66	M	0.28	2.5
5	18–45	66	M	0.38	2.9
5	18–45	66	M	0.535	3.7
5	18–45	66	M	0.31	2.4
5	18–45	66	M	0.33	2.3
5	18–45	66	M	0.455	3
5	18–45	66	M	0.325	2.5
5	18–45	66	M	0.38	2.4
5	18–45	66	M	0.335	2.6
5	18–45	66	M	0.235	2
5	18–45	66	M	0.345	2.6
5	18–45	66	M	0.425	3
5	18–45	66	M	0.25	2
5	18–45	66	M	0.31	2.5
5	18–45	66	M	0.32	1.9
5	18–45	66	M	0.53	3
5	18–45	66	M	0.38	2.7
5	18–45	66	M	0.395	2.8
5	18–45	66	M	0.19	2.4
5	18–45	66	M	0.465	3.1
5	18–45	66	M	0.9	3.2
5	18–45	66	M	0.785	3.5
5	18–45	66	M	0.58	3
5	18–45	66	M	0.44	2.8
5	18–45	66	M	0.24	2.6
5	18–45	66	M	0.425	3.1
5	18–45	66	M	0.315	2.5
5	18–45	66	M	0.37	2.7
5	18–45	66	M	0.315	2.9
5	18–45	66	M	0.245	2.6
5	18–45	66	M	0.49	3.1
5	18–45	66	M	0.255	2.7
5	18–45	66	M	0.41	3
5	18–45	66	M	0.225	2.5
5	18–45	66	M	0.17	2.3
5	18–45	66	M	0.476317	2.9
5	18–45	66	M	0.476317	2.9
6	Control	9	F	0.38	2.8
6	Control	9	F	0.74	3.1
6	Control	9	F	0.54	3
6	Control	9	F	0.41	2.5
6	Control	9	F	0.47	2.9
6	Control	9	F	0.34	2.6
6	Control	9	F	0.69	3.1
6	Control	9	F	0.63	3.1
6	Control	9	F	0.62	3
6	Control	9	F	0.63	3.2
6	Control	9	F	0.46	2.7
6	Control	9	F	0.46	2.9
6	Control	9	F	0.43	2.8
6	Control	9	F	0.6	3.1
6	Control	9	F	0.26	2.4
6	Control	9	F	0.27	2.5
6	Control	9	F	0.39	2.9
6	Control	9	F	0.27	2.3
6	Control	9	M	0.13	2.1
6	Control	9	M	0.39	2.7
6	Control	9	M	0.37	2.6
6	Control	9	M	0.26	2.4
6	Control	9	M	0.45	3.1
6	Control	9	M	0.25	2.4
6	Control	9	M	0.27	2.6
6	Control	9	M	0.43	2.9
6	Control	9	M	0.4	2
6	Control	9	M	0.25	2.4
6	Control	9	M	0.21	2.4
6	Control	9	M	0.28	2.5
6	Control	9	M	0.31	2.5
6	Control	9	M	0.39	2.8
6	Control	9	M	0.34	2.6
6	Control	9	M	0.2	2.2
6	Control	9	M	0.18	2.2
6	Control	9	M	0.32	2.5
6	Control	9	M	0.4	2.8
6	Control	9	M	0.35	2.6
6	Control	9	M	0.35	2.6
6	Control	9	M	0.32	2.6
6	Control	9	M	0.36	2.8
6	Control	9	M	0.31	2.6
6	Control	9	M	0.36	2.8
6	Control	9	M	0.34	2.7
6	Control	9	M	0.37	2.8
6	Control	9	M	0.46	3
6	Control	9	M	0.43	3.6
6	Control	9	M	0.45	3
6	Control	9	M	0.34	2.7
6	Control	9	M	0.41	2.9
6	18–45	66	F	0.53	3
6	18–45	66	F	0.56	3.1
6	18–45	66	F	0.71	3.1
6	18–45	66	F	0.43	2.7
6	18–45	66	F	0.4	2.6
6	18–45	66	F	0.47	2.8
6	18–45	66	F	0.44	2.7
6	18–45	66	F	0.33	2.5
6	18–45	66	M	0.23	2.2
6	18–45	66	M	0.47	3
6	18–45	66	M	0.34	2.7
6	18–45	66	M	0.38	2.9
6	18–45	66	M	0.74	3.2
6	18–45	66	M	0.36	2.5
6	18–45	66	M	0.26	2.3
6	18–45	66	M	0.3	2.5
6	18–45	66	M	0.21	2.3
6	18–45	66	M	0.18	2.1
6	18–45	66	M	0.23	2.5
6	18–45	66	M	0.17	2.3
6	18–45	66	M	0.19	2.3
6	18–45	66	M	0.19	2.5
6	18–45	66	M	0.14	2.2
6	18–45	66	M	0.09	1.8
6	18–45	66	M	0.42	3
6	18–45	66	M	0.37	2.9
6	18–45	66	M	0.34	2.8
6	18–45	66	M	0.36	2.8
6	18–45	66	M	0.34	2.6
6	18–45	66	M	0.22	2.4
6	18–45	66	M	0.19	2.2
6	18–45	66	M	0.24	2.5
6	18–45	66	M	0.19	2
6	18–45	66	M	0.23	2.5
6	18–45	66	M	0.29	2.5
6	18–45	66	M	0.22	2.2
6	18–45	66	M	0.22	2.2
6	18–45	66	M	0.34	2.5
6	18–45	66	M	0.24	2.3
6	18–45	66	M	0.25	2.2
6	18–45	66	M	0.2	2.2
6	18–45	66	M	0.29	2.5
6	18–45	66	M	0.18	2.3
6	18–45	66	M	0.19	2.2
6	18–45	66	M	0.19	2.2
6	7–18	66	F	0.53	3
6	7–18	66	F	0.56	3.1
6	7–18	66	F	0.71	3.1
6	7–18	66	F	0.43	2.7
6	7–18	66	F	0.4	2.6
6	7–18	66	F	0.47	2.8
6	7–18	66	F	0.44	2.7
6	7–18	66	F	0.33	2.5
6	7–18	66	F	0.57	3
6	7–18	66	F	0.26	2.4
6	7–18	66	F	0.35	2.7
6	7–18	66	F	0.39	2.7
6	7–18	66	F	0.35	2.6
6	7–18	66	F	0.44	3
6	7–18	66	F	0.31	2.4
6	7–18	66	F	0.39	2.7
6	7–18	66	F	0.31	2.7
6	7–18	66	M	0.24	2.3
6	7–18	66	M	0.25	2.2
6	7–18	66	M	0.2	2.2
6	7–18	66	M	0.29	2.5
6	7–18	66	M	0.18	2.3
6	7–18	66	M	0.19	2.2
6	7–18	66	M	0.19	2.2
6	7–18	66	M	0.11	1.8
6	7–18	66	M	0.24	2.4
6	7–18	66	M	0.32	2.5
6	7–18	66	M	0.26	2.6
6	7–18	66	M	0.3	2.7
6	7–18	66	M	0.18	2
6	7–18	66	M	0.28	2.7
6	7–18	66	M	0.35	2.8
6	7–18	66	M	0.34	2.7
6	7–18	66	M	0.34	2.7
6	7–18	66	M	0.44	3
6	7–18	66	M	0.44	3.1
6	7–18	66	M	0.32	2.7
6	7–18	66	M	0.31	2.5
6	7–18	66	M	0.36	2.9
6	7–18	66	M	0.29	2.6
6	7–18	66	M	0.43	2.8
6	7–18	66	M	0.25	2.4
6	7–18	66	M	0.21	2.3
6	7–18	66	M	0.24	2.5
6	7–18	66	M	0.2	2.3
6	7–18	66	M	0.25	2.6
6	7–18	66	M	0.17	2.1
6	7–18	66	M	0.16	2
6	7–18	66	M	0.21	2.5
6	7–18	66	M	0.29	2.6
6	7–18	66	M	0.39	2.9
6	7–18	66	M	0.34	2.8
6	7–18	66	M	0.15	2.1
6	7–18	66	M	0.06	1.6
6	7–18	66	M	0.2	2.2
6	7–18	66	M	0.39	2.8
6	7–18	66	M	0.19	2.3
6	7–18	66	M	0.26	2.4
6	7–18	66	M	0.26	2.5
6	7–18	66	M	0.11	2
6	7–18	66	M	0.28	2.5
6	7–18	66	M	0.11	1.7
6	7–18	66	M	0.24	2.3
6	7–18	66	M	0.12	1.9
6	7–18	66	M	0.34	2.7
6	7–18	66	M	0.44	3
6	7–18	66	M	0.44	3.1
6	7–18	66	M	0.32	2.7
6	7–18	66	M	0.31	2.5
6	7–18	66	M	0.36	2.9
6	7–18	66	M	0.29	2.6
6	7–18	66	M	0.43	2.8
6	7–18	66	M	0.25	2.4
6	7–18	66	M	0.21	2.3
6	7–18	66	M	0.24	2.5
6	7–18	66	M	0.2	2.3
6	7–18	66	M	0.25	2.6
6	7–18	66	M	0.17	2.1
6	7–18	66	M	0.16	2
6	7–18	66	M	0.21	2.5
6	7–18	66	M	0.29	2.6
6	7–18	66	M	0.39	2.9
6	7–18	66	M	0.34	2.8
6	7–18	66	M	0.15	2.1
6	7–18	66	M	0.18	2.2
6	7–18	66	M	0.32	2.8
6	7–18	66	M	0.24	2.5
6	7–18	66	M	0.2	2.5
6	7–18	66	M	0.19	2.2
6	7–18	66	M	0.1	2.1
6	7–18	66	M	0.23	2
6	7–18	66	M	0.21	2.3
6	7–18	66	M	0.33	2.5
6	7–18	66	M	0.16	2.2
6	7–18	66	M	0.05	1.6
6	7–18	66	M	0.17	2.1
6	7–18	66	M	0.25	2.7
6	7–18	66	M	0.25	2.5
6	7–18	66	M	0.24	2.4
6	7–18	66	M	0.16	2.1
7	Control	9	F	0.54	3.1
7	Control	9	F	0.37	2.6
7	Control	9	F	0.34	2.6
7	Control	9	F	0.18	2.3
7	Control	9	F	0.25	2.4
7	Control	9	F	0.22	2.4
7	Control	9	F	0.32	2.7
7	Control	9	F	0.16	2.2
7	Control	9	F	0.245	2.4
7	Control	9	F	0.355	2.7
7	Control	9	F	0.19	2.2
7	Control	9	F	0.59	2.9
7	Control	9	F	0.355	2.7
7	Control	9	F	0.605	3.1
7	Control	9	F	0.485	2.8
7	Control	9	F	0.445	2.8
7	Control	9	F	0.46	2.9
7	Control	9	M	0.165	2.1
7	Control	9	M	0.18	2.3
7	Control	9	M	0.265	2.5
7	Control	9	M	0.17	2.2
7	Control	9	M	0.23	2.5
7	Control	9	M	0.22	2.2
7	Control	9	M	0.145	2.1
7	Control	9	M	0.125	2
7	Control	9	M	0.32	2.2
7	Control	9	M	0.13	2.1
7	Control	9	M	0.39	2.7
7	Control	9	M	0.37	2.6
7	Control	9	M	0.26	2.4
7	Control	9	M	0.45	3.1
7	Control	9	M	0.25	2.4
7	Control	9	M	0.27	2.6
7	Control	9	M	0.43	2.9
7	Control	9	M	0.4	2
7	Control	9	M	0.43	2.7
7	Control	9	M	0.32	2.5
7	Control	9	M	0.34	2.6
7	Control	9	M	0.18	2.3
7	Control	9	M	0.25	2.4
7	Control	9	M	0.22	2.4
7	Control	9	M	0.32	2.7
7	Control	9	M	0.19	2.3
7	Control	9	M	0.32	2.4
7	Control	9	M	0.13	1.9
7	Control	9	M	0.1	1.9
7	Control	9	M	0.31	2.5
7	Control	9	M	0.27	2.7
7	Control	9	M	0.4	2.9
7	Control	9	M	0.36	2.5
7	Control	9	M	0.575	2.9
7	Control	9	M	0.545	3.3
7	Control	9	M	0.535	3.3
7	Control	9	M	0.27	2.6
7	Control	9	M	0.43	2.9
7	Control	9	M	0.4	2
7	Control	9	M	0.25	2.4
7	Control	9	M	0.21	2.4
7	Control	9	M	0.28	2.5
7	Control	9	M	0.31	2.5
7	Control	9	M	0.39	2.8
7	Control	9	M	0.4	2.9
7	Control	9	M	0.36	2.5
7	Control	9	M	0.575	2.9
7	7–18	66	F	0.44	2.7
7	7–18	66	F	0.33	2.5
7	7–18	66	F	0.57	3
7	7–18	66	F	0.26	2.4
7	7–18	66	F	0.35	2.7
7	7–18	66	F	0.39	2.7
7	7–18	66	F	0.35	2.6
7	7–18	66	F	0.44	3
7	7–18	66	F	0.31	2.4
7	7–18	66	F	0.39	2.7
7	7–18	66	F	0.31	2.7
7	7–18	66	F	0.28	2.4
7	7–18	66	F	0.21	2.5
7	7–18	66	F	0.29	2.6
7	7–18	66	F	0.39	2.9
7	7–18	66	F	0.34	2.8
7	7–18	66	F	0.15	2.1
7	7–18	66	F	0.06	1.6
7	7–18	66	F	0.2	2.2
7	7–18	66	M	0.36	2.9
7	7–18	66	M	0.29	2.6
7	7–18	66	M	0.43	2.8
7	7–18	66	M	0.25	2.4
7	7–18	66	M	0.21	2.3
7	7–18	66	M	0.24	2.5
7	7–18	66	M	0.2	2.3
7	7–18	66	M	0.25	2.6
7	7–18	66	M	0.17	2.1
7	7–18	66	M	0.16	2
7	7–18	66	M	0.21	2.5
7	7–18	66	M	0.29	2.6
7	7–18	66	M	0.39	2.9
7	7–18	66	M	0.34	2.8
7	7–18	66	M	0.15	2.1
7	7–18	66	M	0.06	1.6
7	7–18	66	M	0.2	2.2
7	7–18	66	M	0.39	2.8
7	7–18	66	M	0.19	2.3
7	7–18	66	M	0.26	2.4
7	7–18	66	M	0.33	2.6
7	7–18	66	M	0.27	2.5
7	7–18	66	M	0.11	2
7	7–18	66	M	0.21	2.7
7	7–18	66	M	0.17	2.1
7	7–18	66	M	0.25	2.7
7	7–18	66	M	0.25	2.5
7	7–18	66	M	0.13	2
7	7–18	66	M	0.08	1.5
7	7–18	66	M	0.07	1.7
7	7–18	66	M	0.04	1.1
7	7–18	66	M	0.34	2.8
7	7–18	66	M	0.36	2.8
7	7–18	66	M	0.34	2.6
7	7–18	66	M	0.22	2.4
7	7–18	66	M	0.19	2.2
7	7–18	66	M	0.24	2.5
7	7–18	66	M	0.44	3.1
7	7–18	66	M	0.32	2.7
7	7–18	66	M	0.31	2.5
7	7–18	66	M	0.36	2.9
7	7–18	66	M	0.29	2.6
7	7–18	66	M	0.43	2.8
7	7–18	66	M	0.25	2.4
7	7–18	66	M	0.21	2.3
7	7–18	66	M	0.24	2.5
7	7–18	66	M	0.2	2.3
7	7–18	66	M	0.25	2.6
7	7–18	66	M	0.17	2.1
7	7–18	66	M	0.32	2.5
8	Control	9	F	0.46	2.7
8	Control	9	F	0.33	2.5
8	Control	9	F	0.42	3.1
8	Control	9	F	0.21	2.4
8	Control	9	F	0.42	2.7
8	Control	9	F	0.26	2.4
8	Control	9	F	0.37	2.7
8	Control	9	F	0.245	2.4
8	Control	9	M	0.26	2.4
8	Control	9	M	0.45	3.1
8	Control	9	M	0.25	2.4
8	Control	9	M	0.27	2.6
8	Control	9	M	0.43	2.9
8	Control	9	M	0.4	2
8	Control	9	M	0.21	2.4
8	Control	9	M	0.28	2.5
8	Control	9	M	0.31	2.5
8	Control	9	M	0.39	2.8
8	Control	9	M	0.17	2.2
8	Control	9	M	0.23	2.5
8	Control	9	M	0.22	2.2
8	Control	9	M	0.28	2.5
8	Control	9	M	0.28	2.5
8	Control	9	M	0.13	1.9
8	Control	9	M	0.1	1.9
8	Control	9	M	0.31	2.5
8	Control	9	M	0.33	2.8
8	Control	9	M	0.325	2.6
8	Control	9	M	0.415	2.7
8	Control	9	M	0.465	2.8
8	Control	9	M	0.315	2.6
8	Control	9	M	0.4	3
8	Control	9	M	0.415	3.2
8	Control	9	M	0.505	3.2
8	Control	9	M	0.255	2.5
8	Control	9	M	0.235	2.3
8	Control	9	M	0.14	2.2
8	Control	9	M	0.14	2
8	Control	9	M	0.195	2.2
8	Control	9	M	0.23	2.4
8	Control	9	M	0.32	2.2
8	Control	9	M	0.13	2.1
8	Control	9	M	0.39	2.7
8	Control	9	M	0.37	2.6
8	Control	9	M	0.26	2.4
8	Control	9	M	0.265	2.5
8	Control	9	M	0.17	2.2
8	Control	9	M	0.23	2.5
8	Control	9	M	0.22	2.2
8	Control	9	M	0.145	2.1
8	Control	9	M	0.125	2
8	Control	9	M	0.32	2.2
8	Control	9	M	0.13	2.1
8	Control	9	M	0.39	2.7
8	Control	9	M	0.37	2.6
8	Control	9	M	0.37	2.8
8	Control	9	M	0.28	2.5
8	Control	9	M	0.28	2.5
8	Control	9	M	0.13	1.9
8	Control	9	M	0.1	1.9
8	Control	9	M	0.35	2.6
8	Control	9	M	0.395	2.4
8	Control	9	M	0.43	2.7
8	Control	9	M	0.4	2.9
8	Control	9	M	0.36	2.5
8	Control	9	M	0.575	2.9
8	Control	9	M	0.545	3.3
8	Control	9	M	0.535	3.3
8	Control	9	M	0.46	3.1
8	Control	9	M	0.4	2.9
8	Control	9	M	0.36	2.5
8	Control	9	M	0.575	2.9
8	Control	9	M	0.545	3.3
8	Control	9	M	0.535	3.3
8	Control	9	M	0.39	2.7
8	Control	9	M	0.37	2.6
8	Control	9	M	0.26	2.4
8	Control	9	M	0.45	3.1
8	Control	9	M	0.25	2.4
8	Control	9	M	0.27	2.6
8	Control	9	M	0.43	2.9
8	Control	9	M	0.42	2.8
8	7–18	66	F	0.44	3
8	7–18	66	F	0.31	2.4
8	7–18	66	F	0.39	2.7
8	7–18	66	F	0.31	2.7
8	7–18	66	F	0.28	2.4
8	7–18	66	F	0.31	2.6
8	7–18	66	F	0.26	2.3
8	7–18	66	F	0.21	2
8	7–18	66	F	0.31	2.5
8	7–18	66	M	0.24	2.5
8	7–18	66	M	0.19	2
8	7–18	66	M	0.23	2.5
8	7–18	66	M	0.29	2.5
8	7–18	66	M	0.22	2.2
8	7–18	66	M	0.22	2.2
8	7–18	66	M	0.34	2.5
8	7–18	66	M	0.24	2.3
8	7–18	66	M	0.25	2.2
8	7–18	66	M	0.2	2.2
8	7–18	66	M	0.29	2.5
8	7–18	66	M	0.18	2.3
8	7–18	66	M	0.19	2.2
8	7–18	66	M	0.19	2.2
8	7–18	66	M	0.11	1.8
8	7–18	66	M	0.24	2.4
8	7–18	66	M	0.32	2.5
8	7–18	66	M	0.26	2.6
8	7–18	66	M	0.16	2.2
8	7–18	66	M	0.05	1.6
8	7–18	66	M	0.35	2.8
8	7–18	66	M	0.31	2.5
8	7–18	66	M	0.15	1.9
8	7–18	66	M	0.28	2.2
8	7–18	66	M	0.18	2.1
8	7–18	66	M	0.16	2
8	7–18	66	M	0.17	1.9
8	7–18	66	M	0.27	2.5
8	7–18	66	M	0.22	2.3
8	7–18	66	M	0.29	2.5
8	7–18	66	M	0.24	2.4
8	7–18	66	M	0.16	2.1
8	7–18	66	M	0.13	2
8	7–18	66	M	0.06	1.5
8	7–18	66	M	0.28	2.6
8	7–18	66	M	0.21	2.7
8	7–18	66	M	0.17	2.1
8	7–18	66	M	0.25	2.7
8	7–18	66	M	0.25	2.5
8	7–18	66	M	0.13	2
8	7–18	66	M	0.08	1.5
8	7–18	66	M	0.07	1.7
8	7–18	66	M	0.04	1.1

## Sheet: Table S5
Table S5. Quality raw data, with the number of reads before and after trimming process, the alignment efficiency and the bisulfite conversion efficiency for each sample
Density level (fish/L)	Period (dpf)	Sex	Sample code	Number of raw reads	Number of reads retained	Number of reads trimmed	Number of reads aligned	Alignment efficiency	Bisulfite conversion efficiency
9	Control	Female	G1_FLD	191853	114167	77686	51593	66.4122	99.6
			G2_FLD	143729	81554	62175	33126	53.2786	99.6
			G5_FLD	150458	60454	90004	46450	51.6088	99.4
			G6_FLD	220432	102424	118008	80897	68.5521	99.6
			G7_FLD	108598	42262	66336	41951	63.2402	99.5
			G12_FLD	91391	30135	61256	37775	61.6674	99.6
			G14_FLD	92827	18703	74124	46598	62.8649	99.6
			G15_FLD	133104	18551	114553	86740	75.7204	99.5
			G17_FLD	18199	10551	7648	5418	70.8421	99.6
			G19_FLD	37077	22443	14634	9098	62.1703	99.6
		Male	G3_MLD	91078	13697	77381	56086	72.4803	99.5
			G4_MLD	72043	6728	65315	49859	76.3362	99.6
			G9_MLD	89708	21485	68223	48488	71.0728	99.7
			G10_MLD	99342	33979	65363	44241	67.6851	99.6
			G11_MLD	98479	30958	67521	43605	64.5799	99.5
			G18_MLD	158612	15945	142667	111023	77.8197	99.6
			G20_MLD	104023	8113	95910	67769	70.659	99.5
			G21_MLD	121845	20538	101307	79872	78.8415	99.5
			G24_MLD	19026	3052	15974	12147	76.0423	99.5
			G26_MLD	120879	17025	103854	68522	65.9792	99.5
66	18–45	Female	G2_FHD	139010	57597	81413	50786	62.3807	99.7
			G3_FHD	37635	6410	31225	21496	68.8423	99.5
			G6_FHD	33131	12573	20558	11431	55.6037	99.3
			G11_FHD	82648	20702	61946	33798	54.5604	99.5
			G12_FHD	88610	14529	74081	46015	62.1144	99.6
			G14_FHD	71087	16876	54211	27158	50.0968	99.4
			G16_FHD	69305	13787	55518	33094	59.6095	99.6
			G18_FHD	147065	24333	122732	90207	73.4992	99.5
			G22_FHD	176211	62277	113934	81278	71.3378	99.6
			G26_FHD	94314	33884	60430	34766	57.531	99.6
		Male	G5_MHD	211645	7386	204259	118330	57.9314	99.6
			G8_MHD	95836	14516	81320	61392	75.4943	99.5
			G10_MHD	137364	27573	109791	83005	75.6027	99.5
			G13_MHD	127628	7794	119834	95340	79.5601	99.5
			G15_MHD	85382	6969	78413	60134	76.6888	99.5
			G20_MHD	93475	16411	77064	60020	77.8833	99.6
			G21_MHD	153696	17213	136483	105266	77.1276	99.6
			G23_MHD	55422	2553	52869	41088	77.7166	99.6
			G24_MHD	66179	3152	63027	43533	69.0704	99.6
			G25_MHD	117550	5456	112094	92421	82.4496	99.6
			Mean	106147	26118.9	80028.5	55295.4	68.0738	99.55
			SD	48329	26013.2	38313.1	28431.6	8.6711	0.0784465
